# Supplementary material for: Role of Resveratrol and Selenium on Oxidative Stress and Expression of Antioxidant and Anti-Aging Genes in Immortalized Lymphocytes from Alzheimer’s Disease Patients
Source: PubMed Central journal article supplement (PMC6723840; doi:10.3390/nu11081764), 2019-07-31
Supplement: nutrients-11-01764-s001.pdf [file nutrients-11-01764-s001.pdf]

**Table S1.** List of primers and probe sets used for real time RT-PCR analysis

| <b>Gene Symbol</b> | <b>Reference (ABI)</b> | <b>Reference Sequence ID</b> |
|--------------------|------------------------|------------------------------|
| <i>B2M</i>         | Hs00984230_m1          | NM_004048.2                  |
| <i>CASP1</i>       | Hs00354836_m1          | NM_033295.3                  |
| <i>CAT</i>         | Hs00156308_m1          | NM_001752.3                  |
| <i>CCS</i>         | Hs00192851_m1          | NM_005125.1                  |
| <i>EP300</i>       | Hs00914212_m1          | NM_001429.3                  |
| <i>FOXO1</i>       | Hs00231106_m1          | NM_002015.3                  |
| <i>GLA</i>         | Hs00609238_m1          | NM_000169.2                  |
| <i>GPX1</i>        | Hs00829989_gH          | NM_001329455.1               |
| <i>GPX4</i>        | Hs00989766_g1          | NM_002085.4                  |
| <i>GSR</i>         | Hs00167317_m1          | NM_001195104.2               |
| <i>GSTZ1</i>       | Hs01041668_m1          | NM_001312660.1               |
| <i>NFE2L2</i>      | Hs00975961_g1          | NM_001313903.1               |
| <i>PGK1</i>        | Hs00943178_g1          | NM_000291.3                  |
| <i>PRDX5</i>       | Hs00738905_g1          | NM_181651.2                  |
| <i>SIRT1</i>       | Hs01009006_m1          | NM_012238.4                  |
| <i>SIRT3</i>       | Hs00953477_m1          | NM_001017524.2               |
| <i>SIRT6</i>       | Hs00213036_m1          | NM_001321062.1               |
| <i>SNAP23</i>      | Hs01047496_m1          | NM_130798.2                  |
| <i>SOD2</i>        | Hs00167309_m1          | NM_001322817.1               |
| <i>TFB1M</i>       | Hs01084404_m1          | NM_001350502.1               |
| <i>TINF2</i>       | Hs01554307_g1          | NM_001099274.1               |
| <i>TOLLIP</i>      | Hs04980661_s1          | NM_001318512.1               |
| <i>TXNIP</i>       | Hs01006897_g1          | NM_006472.5                  |
| <i>VPS13C</i>      | Hs00419559_m1          | NM_017684.4                  |
